# Supplementary material for: MicroRNA markers for forensic body fluid identification obtained from microarray screening and quantitative RT-PCR confirmation
Source: PubMed Central journal article supplement — Int J Legal Med. 2010 Feb 10;124(3):217–26. doi: 10.1007/s00414-009-0402-3 (PMC2855015; doi:10.1007/s00414-009-0402-3), 2010-02-10
Supplement: 414_2009_402_MOESM4_ESM.pdf [file 414_2009_402_MOESM4_ESM.pdf]

|    |                    |
|----|--------------------|
| MS | menstrual blood    |
| SA | saliva             |
| SE | semen              |
| VS | vaginal secretion  |
| WB | whole venous blood |

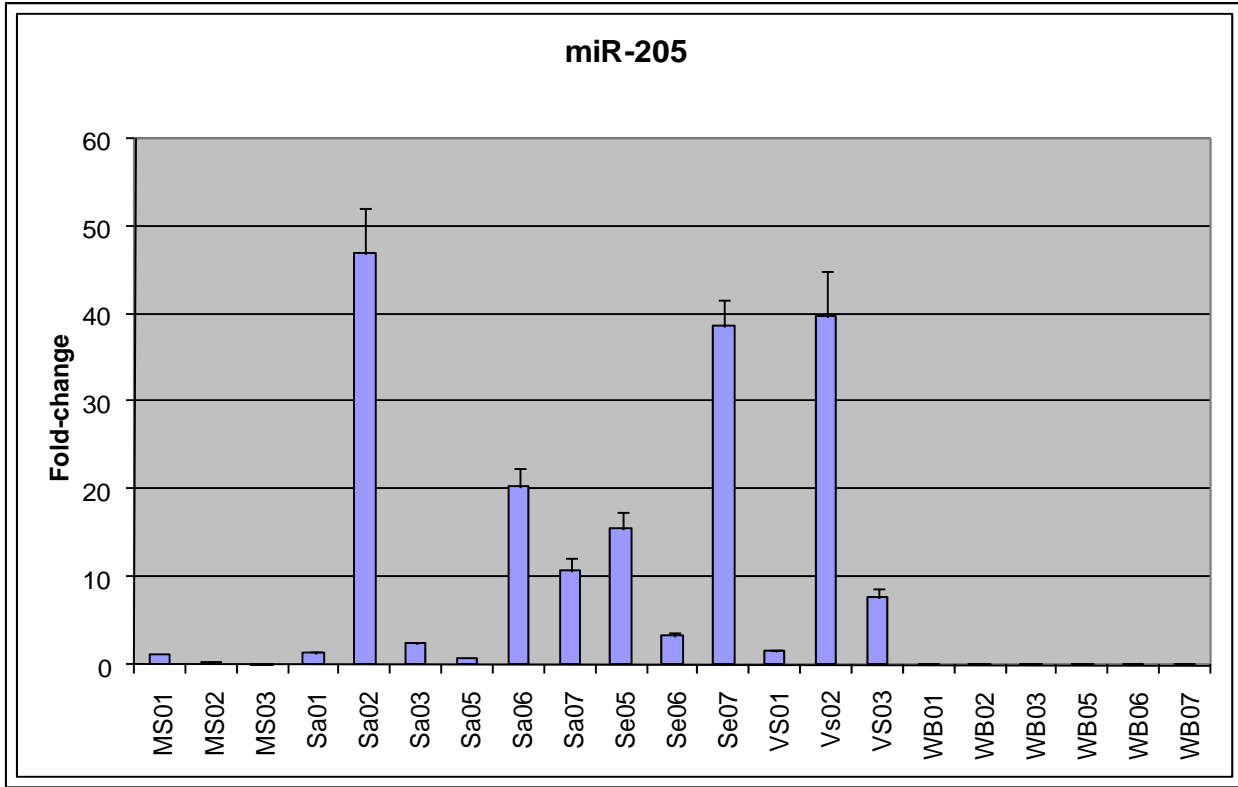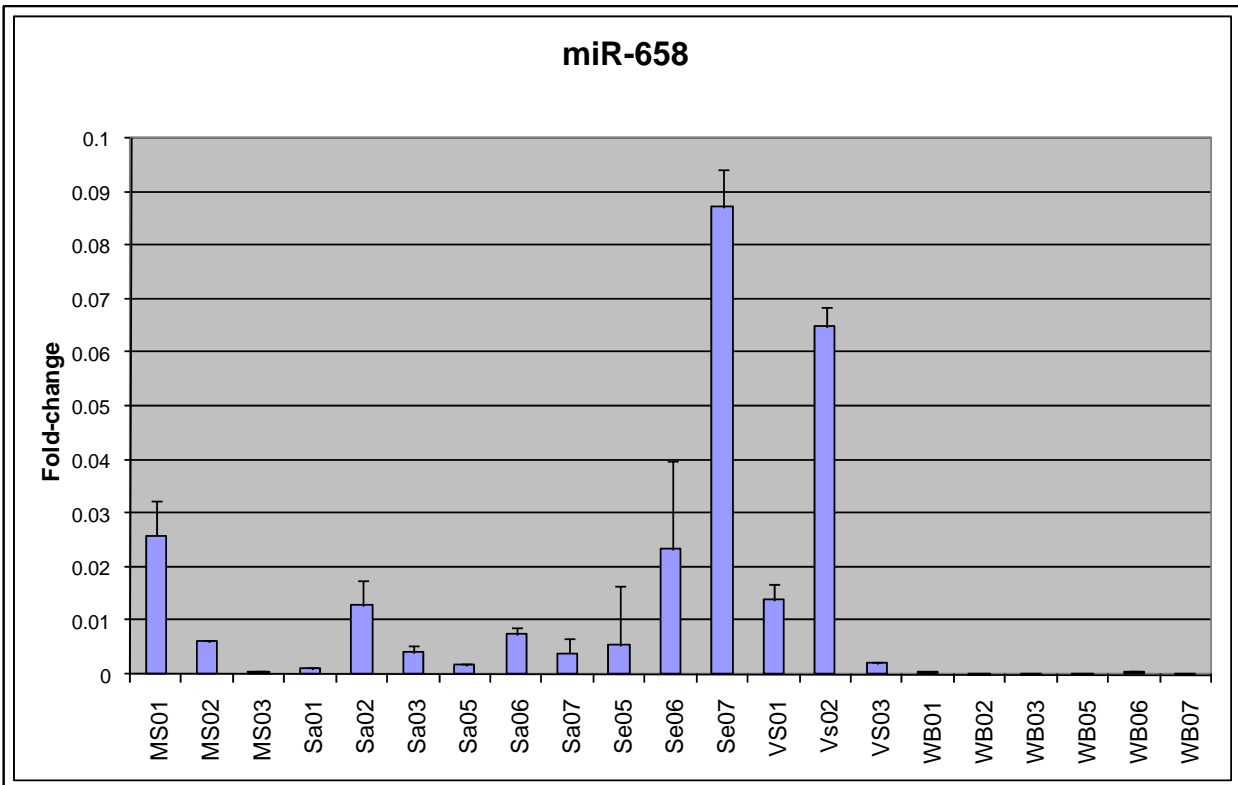

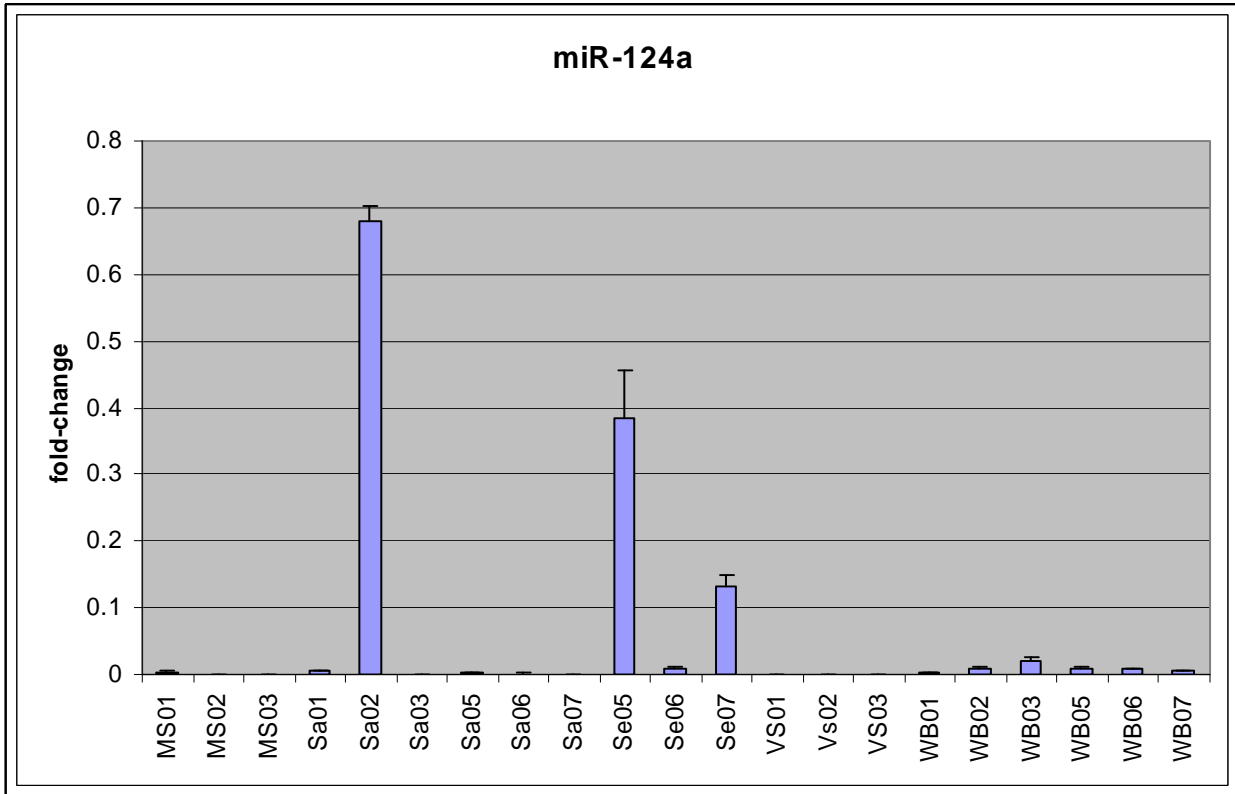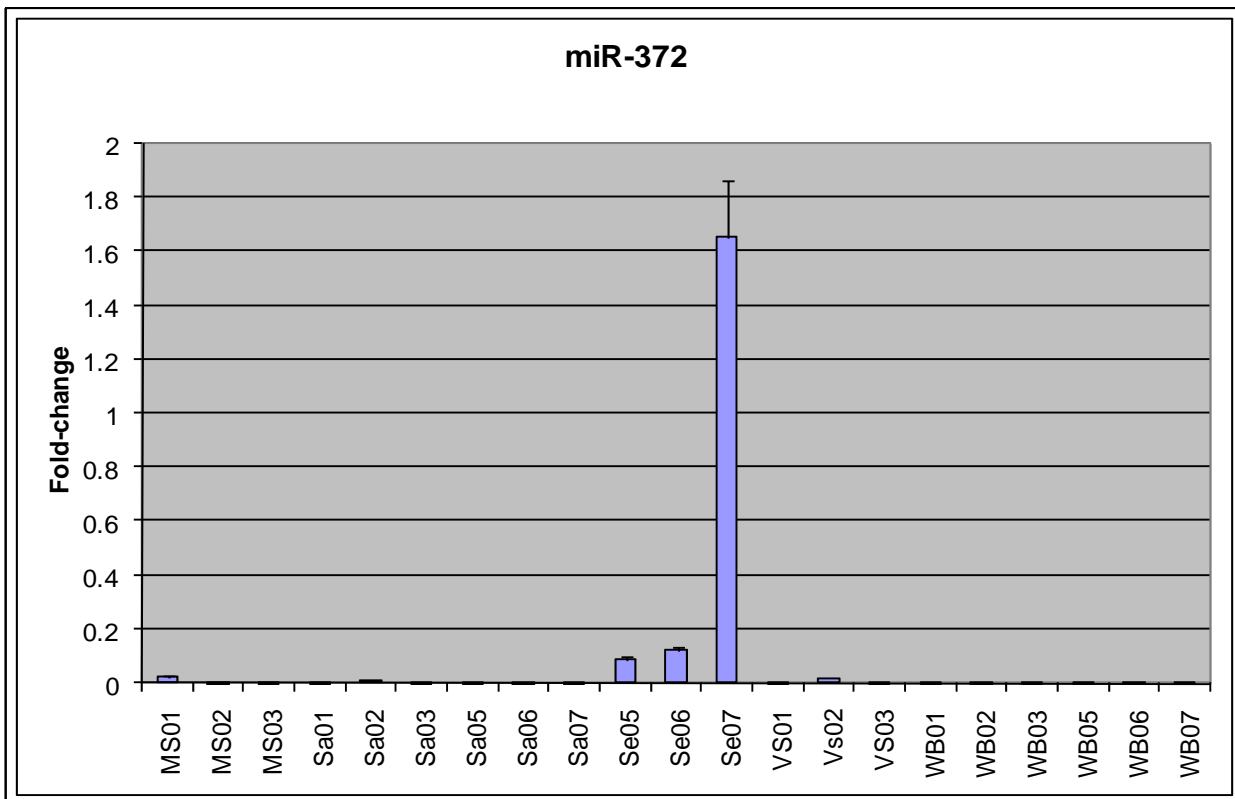

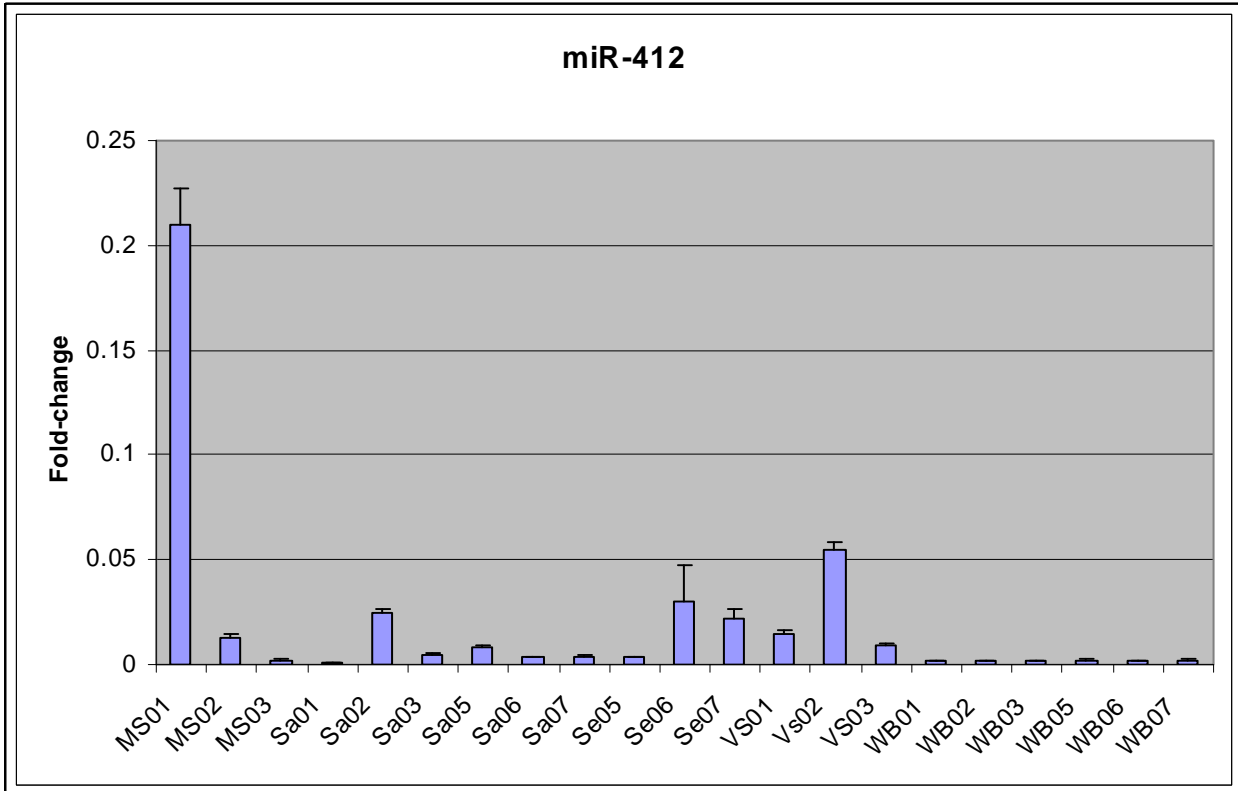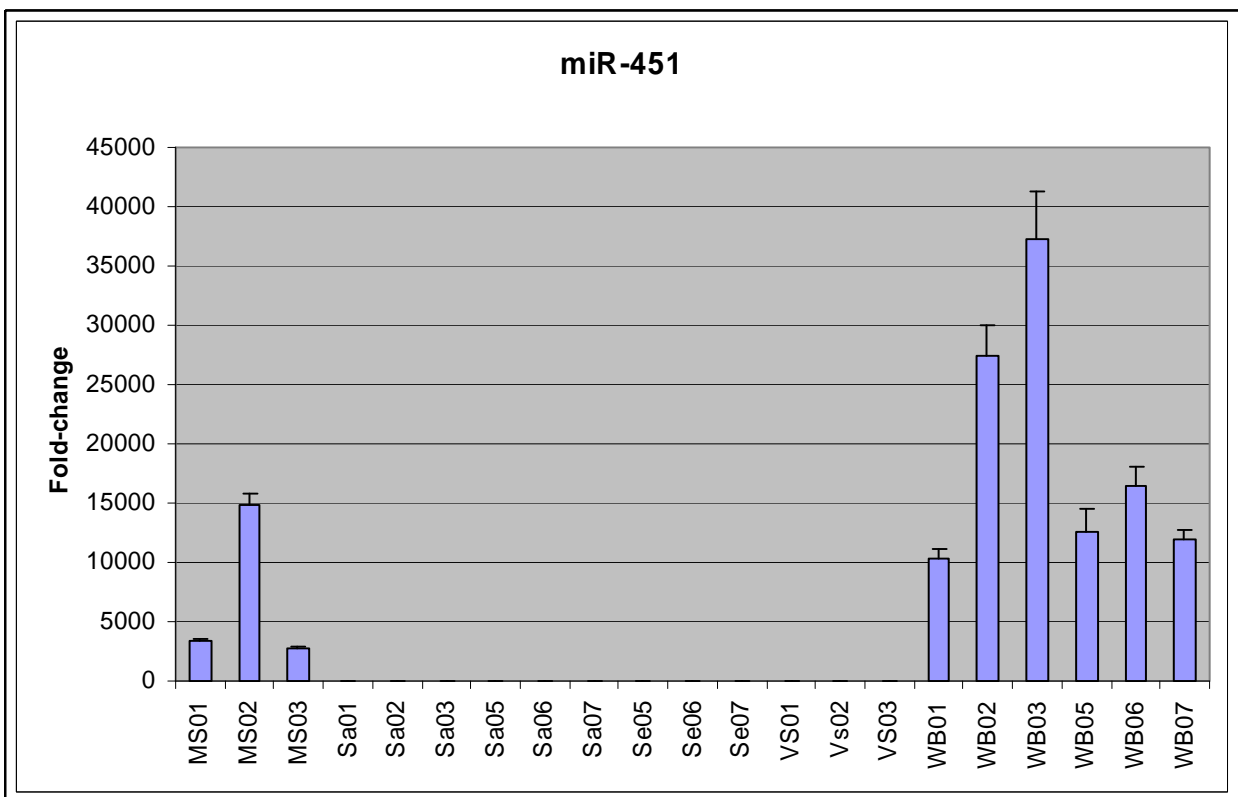

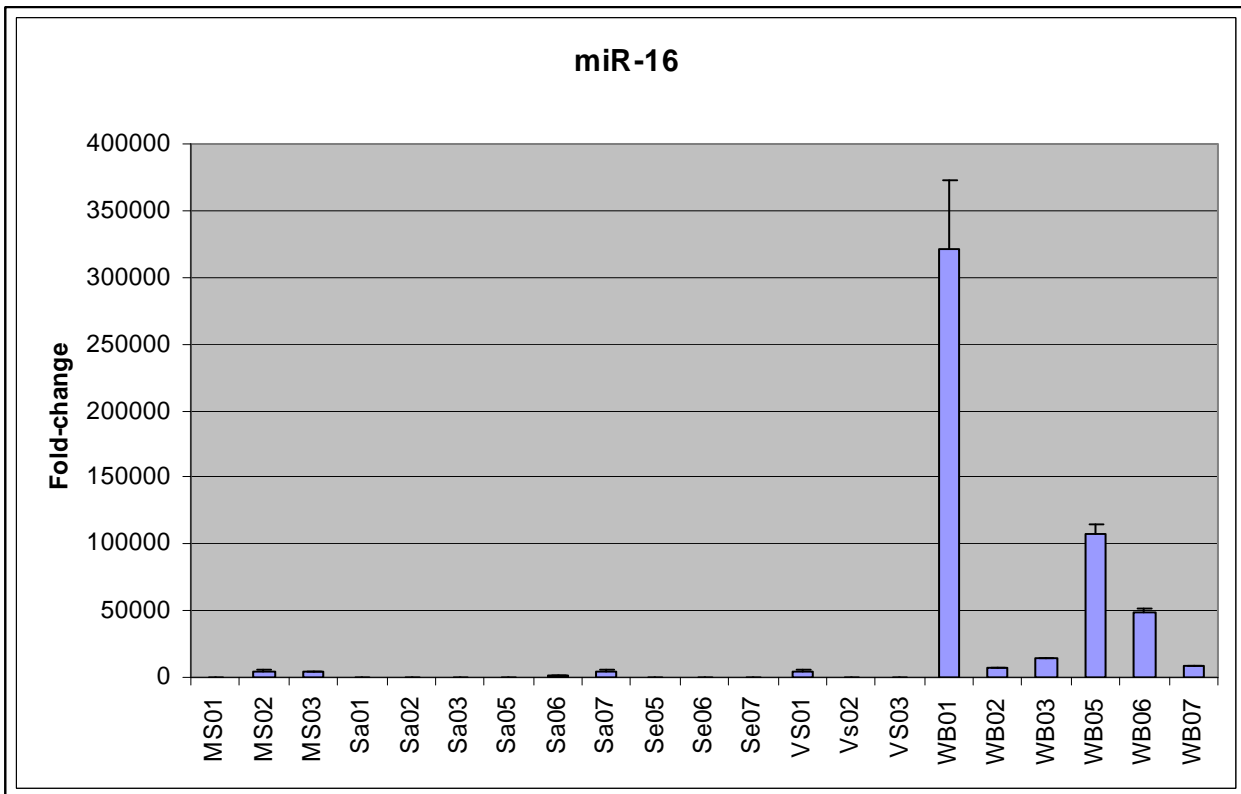

MicroRNA markers for forensic body fluid identification obtained from microarray screening and quantitative RT-PCR confirmation  
Dmitry Zubakov<sup>1</sup>, Anton W.M. Boersma<sup>2</sup>, Ying Choi<sup>1</sup>, Patricia F. van Kuijk<sup>2</sup>, Erik A.C. Wiemer<sup>2</sup>, and Manfred Kayser<sup>1\*</sup>  
<sup>1</sup> Department of Forensic Molecular Biology, Erasmus University Medical Center Rotterdam, The Netherlands  
<sup>2</sup> Department of Medical Oncology, Josephine Nefkens Institute, Erasmus University Medical Center Rotterdam, The Netherlands  
\*Corresponding author: m.kayser@erasmusmc.nl
