# Supplementary material for: MicroRNA markers for forensic body fluid identification obtained from microarray screening and quantitative RT-PCR confirmation
Source: Springer Nature journal article supplement (doi:10.1007/s00414-009-0402-3), 2010-02-09
Supplement: MOESM1 [file 8445952]

| #  | miRNA ID      | Applied Biosystems<br>TaqMan Assay ID | Target Sequence                                             | Species specificity: |               |                    | Complete sequence homology with human miRNA: |                    |                 |
|----|---------------|---------------------------------------|-------------------------------------------------------------|----------------------|---------------|--------------------|----------------------------------------------|--------------------|-----------------|
|    |               |                                       |                                                             | Homo sapiens*        | Mus musculus* | Rattus norvegicus* | Pan troglodytes **                           | Canis familiaris** | Gallus gallus** |
| 1  | hsa-miR-144   | 2676                                  | UACAGUAUAGAUGAUGUACU                                        | +                    | +             | +                  | +                                            | +                  |                 |
| 2  | hsa-miR-185*  | 2104                                  | AGGGGUGGCUUUCUCUGGUC                                        | +                    |               |                    |                                              |                    |                 |
| 3  | hsa-miR-20a   | 580                                   | UAAAGUGCUUAUAGUGCAGGUAG                                     | +                    | +             | +                  | +                                            | +                  | +               |
| 4  | hsa-miR-106a  | 2169                                  | AAAAGUGCUUACAGUGCAGGUAG                                     | +                    |               |                    |                                              |                    |                 |
| 5  | hsa-miR-185   | 2271                                  | UGGAGAGAAAGGCAGUUCUGA                                       | +                    | +             | +                  | +                                            | +                  |                 |
| 6  | hsa-miR-943   | 2188                                  | CUGACUGUUGCCGUCCUCCAG                                       | +                    |               |                    | +                                            |                    |                 |
| 7  | hsa-miR-135a  | 460                                   | UAUGGCUUUUAUUCUAUGUGA                                       | +                    | +             | +                  | +                                            | +                  | +               |
| 8  | hsa-miR-507   | 1051                                  | UUUUGCACCUUUUGGAGUGAA                                       | +                    |               |                    | +                                            |                    |                 |
| 9  | hsa-miR-10a   | 387                                   | UACCCUGUAGAUCGAAUUUGUG                                      | +                    | +             | +                  | +                                            | +                  |                 |
| 10 | hsa-miR-583   | 1623                                  | CAAAGAGGAAGGUCCAUUAC                                        | +                    |               |                    | +                                            |                    |                 |
| 11 | hsa-miR-518c* | 1158                                  | UCUCUGGAGGGAAGCACUUUCUG                                     | +                    |               |                    |                                              |                    |                 |
| 12 | hsa-miR-208b  | 2290                                  | AUAAGACGAACAAAAGGUUUGU                                      | +                    | +             | +                  | +                                            | +                  |                 |
| 13 | hsa-miR-617   | 1591                                  | AGACUUCCAUUAUGAAGGUGGC                                      | +                    |               |                    | +                                            |                    |                 |
| 14 | hsa-miR-891a  | 2191                                  | UGCAACGAACCGAGCCACUGA                                       | +                    |               |                    |                                              |                    |                 |
| 15 | hsa-miR-658   | 1513                                  | GGCGGAGGGAAGUAGGUCCGUUGGU                                   | +                    |               |                    |                                              |                    |                 |
| 16 | hsa-miR-205   | 509                                   | UCCUUCAUCCACCGGAGUCUG                                       | +                    | +             | +                  | +                                            | +                  | +               |
| 17 | hsa-miR-16    | 391                                   | UAGCAGCACGUAAAUAUUGGCG                                      | +                    | +             | +                  | +                                            |                    |                 |
| 18 | hsa-miR-10b   | 2218                                  | UACCCUGUAGAACCGAAUUUGUG                                     | +                    | +             |                    | +                                            |                    |                 |
| 19 | hsa-miR-412   | 1023                                  | ACUUCACCGUGGCACUAGCCGU                                      | +                    |               | +                  | +                                            |                    |                 |
| 20 | hsa-miR-451   | 1141                                  | AAACCGUACCAUACUGAGUU                                        | +                    | +             | +                  | +                                            | +                  | +               |
| 21 | hsa-miR-372   | 560                                   | AAAGUGCUGCGACAUUUGAGCGU                                     | +                    |               |                    | +                                            |                    |                 |
| 22 | hsa-miR-124a  | 1182                                  | UAAGGCACGCGUGAAUGCC                                         | +                    | +             | +                  | +                                            |                    |                 |
| 23 | RNU24         | 1001                                  | AUUUGCUAUCUGAGAGAUGGUGAUGACAUUUUAAACCACCAAGAUCGCUGAUGCA     | +                    |               |                    |                                              |                    |                 |
| 24 | RNU44         | 1094                                  | CCUGGAUGAUGAUGAAAUGCUGACUGAACAUAGAAGGUCUUAUUAGCUCUAAACUGACU | +                    |               |                    |                                              |                    |                 |
| 25 | RNU48         | 1006                                  | GAUGACCCAGGUAACUCUGAGUGUGUCGUGAUGCCAUCACCGCAGCGCUCUGACC     | +                    |               |                    |                                              |                    |                 |

\* - according to the "Assay Index File v8 for miRNA" available online at [http://www3.appliedbiosystems.com/cms/groups/portal/documents/generaldocuments/cms\\_052133.xls](http://www3.appliedbiosystems.com/cms/groups/portal/documents/generaldocuments/cms_052133.xls)

\*\* - according to the BLAST search of target sequences at <http://www.mirbase.org/search.shtml>
