# Supplementary material for: MicroRNA markers for forensic body fluid identification obtained from microarray screening and quantitative RT-PCR confirmation
Source: Springer Nature journal article supplement (doi:10.1007/s00414-009-0402-3), 2010-02-09
Supplement: MOESM2 [file 8445952]

## Plot of PAM scores for 5 body fluids:

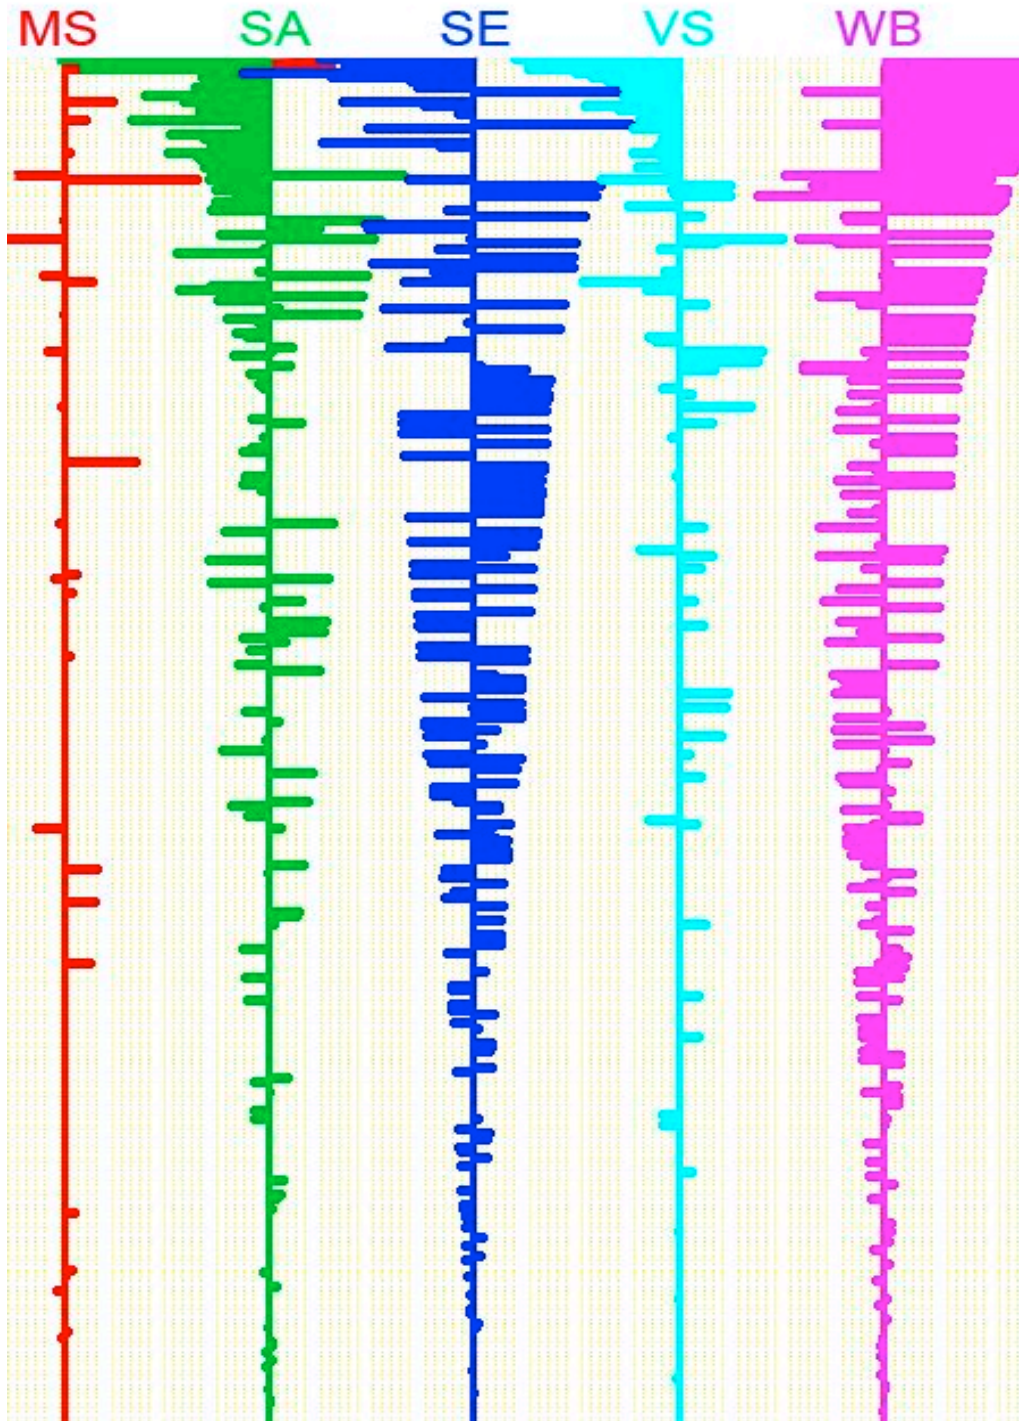

MS - menstrual blood  
SA - saliva  
SE - semen  
VS - vaginal secretion  
WB - whole blood

| Probe name          | PAM scores: |         |         |         |         |
|---------------------|-------------|---------|---------|---------|---------|
|                     | MS          | SA      | SE      | VS      | WB      |
| hsa-let-7a          | 0           | -0.1327 | -0.0728 | 0       | 0.867   |
| hsa-let-7b          | 0           | -0.3669 | 0       | 0       | 0.8218  |
| hsa-let-7b-star     | 0           | 0       | 0       | 0       | 0.1093  |
| hsa-let-7d          | 0           | -0.0538 | 0       | -0.1608 | 0.7504  |
| hsa-let-7f          | 0           | -0.6504 | 0       | -0.1567 | 1.5056  |
| hsa-let-7g          | 0           | -0.5688 | 0       | -0.1101 | 1.3135  |
| hsa-let-7i          | 0           | -0.5846 | -0.2844 | 0       | 1.1275  |
| hsa-miR-1           | 0           | 0.1826  | 0       | 0       | 0       |
| hsa-miR-101         | 0           | -0.0854 | -0.3522 | -0.1941 | 1.03    |
| hsa-miR-103         | 0           | -0.6752 | 0       | 0       | 1.3978  |
| hsa-miR-106a        | 0           | -1.2333 | 0       | -0.5426 | 1.8162  |
| hsa-miR-106b        | 0.487       | -0.8559 | -1.3011 | -0.2781 | 1.8029  |
| hsa-miR-106b-star   | 0           | 0       | 0       | -0.1689 | 0       |
| hsa-miR-107         | 0           | -0.1993 | 0       | 0       | 0.731   |
| hsa-miR-10a         | 0           | 0       | 0.7329  | 0       | -0.4133 |
| hsa-miR-10a-star    | 0           | 0.0411  | 0       | 0       | 0       |
| hsa-miR-124         | 0           | 0       | 0.2185  | 0       | -0.5088 |
| hsa-miR-124-star    | 0           | 0.0802  | 0       | 0       | 0       |
| hsa-miR-125b        | 0           | 0       | 0.1017  | 0       | 0       |
| hsa-miR-125b-1-star | 0           | 0       | 0.6741  | 0       | -0.3679 |
| hsa-miR-126-star    | 0           | -0.0914 | 0       | 0       | 0.5855  |
| hsa-miR-130a        | 0           | -0.7137 | 0       | -0.1729 | 1.4121  |
| hsa-miR-130b        | 0           | 0       | 0       | 0       | 0.06    |
| hsa-miR-130b-star   | 0           | 0       | -0.1392 | 0       | 0       |
| hsa-miR-133b        | 0           | 0       | 0.6292  | 0       | -0.0474 |
| hsa-miR-135a        | 0           | 0       | 0.7369  | 0       | 0       |
| hsa-miR-135a-star   | 0           | 0       | -0.2337 | 0       | 0       |
| hsa-miR-135b        | 0           | 0       | 0.4637  | 0       | 0       |
| hsa-miR-135b-star   | 0           | 0       | 0       | 0       | 0.251   |
| hsa-miR-138         | 0           | 0       | -0.5606 | 0       | 0       |
| hsa-miR-138-2-star  | 0.2964      | 0       | 0       | 0       | 0       |
| hsa-miR-140-3p      | 0           | -0.1216 | -0.3977 | -0.1446 | 0.9815  |
| hsa-miR-141         | 0           | 0       | 0.4814  | 0       | -0.4562 |
| hsa-miR-141-star    | 0           | 0       | 0       | 0       | -0.0995 |
| hsa-miR-142-3p      | 0           | 0       | -0.2115 | 0       | 0.3043  |
| hsa-miR-142-5p      | 0           | -0.1255 | -1.4831 | 0       | 0.8439  |
| hsa-miR-143-star    | 0           | 0       | -0.1912 | 0       | 0       |
| hsa-miR-144         | 2.6282      | -1.825  | -1.2798 | -1.4743 | 2.2889  |
| hsa-miR-144-star    | 1.7617      | -2.0503 | -1.5058 | -1.6117 | 3.129   |
| hsa-miR-145-star    | 0           | 0       | 0.6339  | 0       | 0       |
| hsa-miR-146a        | 0           | -0.1669 | 0.0704  | 0       | 0.0666  |
| hsa-miR-146b-5p     | 0           | 0       | 0       | 0       | 0.022   |
| hsa-miR-147b        | 0           | 0       | 0       | 0       | -0.1612 |
| hsa-miR-148b        | 0           | 0       | 0       | -0.0276 | 0       |
| hsa-miR-148b-star   | 0.0915      | 0       | 0       | 0       | 0       |
| hsa-miR-151-3p      | 0           | 0       | 0.1682  | 0       | -0.1988 |
| hsa-miR-151-5p      | 0           | -0.5956 | 0       | 0       | 0.9438  |
| hsa-miR-154         | 0           | 0       | 0       | 0       | 0.0918  |
| hsa-miR-155         | 0           | 0.4189  | 0       | 0       | -0.0158 |
| hsa-miR-15a         | 0           | 0       | -0.2459 | -0.2323 | 0.8408  |
| hsa-miR-15b         | 0.2822      | 0       | -0.6913 | -0.9362 | 0.9692  |
| hsa-miR-16          | 0           | -0.2479 | 0       | -0.0355 | 0.6969  |
| hsa-miR-16-2-star   | 0           | 0       | -0.0937 | 0       | 0       |
| hsa-miR-17          | 0.0534      | -0.9932 | 0       | -0.4418 | 1.4258  |
| hsa-miR-181a        | 0           | -0.1954 | 0       | 0       | 0.7174  |
| hsa-miR-182         | 0           | -0.6954 | -0.0611 | -0.5895 | 1.716   |
| hsa-miR-183         | 0           | 0       | -0.4123 | 0       | 0.0359  |
| hsa-miR-184         | -0.0696     | 0.647   | 0       | 0       | -0.0442 |
| hsa-miR-185         | 0           | -0.2485 | -1.0375 | -0.4401 | 1.5372  |
| hsa-miR-185-star    | 0.7025      | 0       | 0       | 0       | 0       |

|                    |         |         |         |         |         |
|--------------------|---------|---------|---------|---------|---------|
| hsa-miR-186        | 0       | 0       | 0       | 0       | 0.1016  |
| hsa-miR-187        | 0       | 0       | 0.4214  | 0       | -0.0325 |
| hsa-miR-18a        | 0       | 0       | -2.2866 | -0.9955 | 1.3876  |
| hsa-miR-18b        | 0       | -0.6899 | -1.402  | -0.8542 | 2.2646  |
| hsa-miR-18b-star   | 0       | 0       | 1.0102  | 0       | 0       |
| hsa-miR-190        | 0       | -0.5244 | 0       | -0.0887 | 1.2427  |
| hsa-miR-191        | 0       | -0.5096 | 0       | -0.4911 | 1.177   |
| hsa-miR-193a-3p    | 0       | 0       | 0.1364  | 0       | -0.248  |
| hsa-miR-193a-5p    | 0       | 0       | 0       | 0.2687  | -0.6394 |
| hsa-miR-193b       | 0       | 0       | 0       | 0.2453  | -0.418  |
| hsa-miR-193b-star  | 0       | 0       | 0       | 0.4884  | -0.4873 |
| hsa-miR-194        | 0       | 0       | -0.4812 | 0       | 0.387   |
| hsa-miR-194-star   | 0.0509  | 0       | 0       | 0       | 0       |
| hsa-miR-195-star   | 0       | 0       | -0.5745 | 0       | 0       |
| hsa-miR-196b       | 0       | 0       | 0.152   | 0       | 0       |
| hsa-miR-197        | 0       | 0       | -0.6312 | 0       | 0       |
| hsa-miR-198        | 0       | 0       | 0.2652  | 0       | -0.3749 |
| hsa-miR-19a        | 0       | -0.7028 | -0.1627 | -0.2977 | 1.6685  |
| hsa-miR-19b        | 0       | -0.6592 | 0       | -0.3965 | 1.3307  |
| hsa-miR-200a       | 0       | 0       | 0.1949  | 0       | 0       |
| hsa-miR-200b       | 0       | 0       | 0.5758  | 0       | 0       |
| hsa-miR-200b-star  | 0       | 0.0409  | 0       | 0       | -0.0367 |
| hsa-miR-200c       | 0       | 0       | 0.4151  | 0       | -0.3802 |
| hsa-miR-202        | 0       | 0       | 0       | 0       | 0.1981  |
| hsa-miR-202-star   | 0       | 0       | 0.0584  | 0       | 0       |
| hsa-miR-203        | -0.1848 | 0.0501  | 0       | 0.8252  | -0.194  |
| hsa-miR-205        | 0       | 0.0306  | 0       | 0       | -0.1779 |
| hsa-miR-206        | 0       | 0       | -0.1643 | 0       | 0       |
| hsa-miR-208a       | 0       | 0       | 0       | 0.2232  | -0.2296 |
| hsa-miR-208b       | -0.0333 | 1.1043  | 0       | 0       | -0.35   |
| hsa-miR-20a        | 0       | -0.6141 | -0.64   | -0.7016 | 2.0441  |
| hsa-miR-20b        | 0       | -0.9835 | 0       | 0       | 1.5254  |
| hsa-miR-21         | 0       | -0.1797 | 0       | 0       | 0.0048  |
| hsa-miR-210        | 0       | 0       | 0       | 0       | 0.1751  |
| hsa-miR-216b       | 0       | 0       | 0       | 0       | -0.1455 |
| hsa-miR-22         | 0       | -0.6154 | 0       | 0       | 0.5835  |
| hsa-miR-220b       | 0       | 0       | -0.3129 | 0       | 0.0774  |
| hsa-miR-223-star   | 0       | 0       | 0.2775  | 0       | -0.0286 |
| hsa-miR-224        | 0       | 0       | 0.2817  | 0       | -0.0688 |
| hsa-miR-22-star    | 0       | 0.3943  | -0.183  | 0       | 0       |
| hsa-miR-23a        | 0       | 0.0382  | -0.1148 | 0       | 0       |
| hsa-miR-23a-star   | 0       | 0       | -0.6557 | 0       | 0       |
| hsa-miR-24-1-star  | 0       | 0       | -0.0634 | 0       | 0       |
| hsa-miR-25         | 0       | -0.6597 | -0.4821 | -0.9046 | 1.7907  |
| hsa-miR-26a        | 0       | -0.2775 | 0       | 0       | 0.6792  |
| hsa-miR-26b        | -0.0112 | -0.2054 | 0       | 0       | 0.7748  |
| hsa-miR-27a        | 0       | 0       | -0.101  | 0       | 0       |
| hsa-miR-28-5p      | 0       | -0.5187 | 0       | 0       | 0.9023  |
| hsa-miR-296-5p     | 0       | 0       | 1.2213  | 0.54    | -1.2231 |
| hsa-miR-297        | 0       | 0       | -0.3591 | 0       | 0       |
| hsa-miR-299-3p     | 0       | -0.0225 | 0.0531  | 0       | 0       |
| hsa-miR-29a        | 0       | -0.0382 | 0       | 0       | 0       |
| hsa-miR-29b        | 0       | 0       | 0       | 0       | 0.1711  |
| hsa-miR-29b-1-star | 0       | 0       | -0.2252 | 0       | 0       |
| hsa-miR-29c        | 0       | -0.2675 | 0       | 0       | 0.1714  |
| hsa-miR-29c-star   | 0       | 0       | 0.4878  | 0       | 0       |
| hsa-miR-300        | 0       | 0       | 0       | 0       | 0.1962  |
| hsa-miR-302c-star  | 0       | 0.3176  | 0       | 0.1784  | -0.5872 |
| hsa-miR-30a        | 0       | -0.6034 | 0       | 0       | 0.563   |
| hsa-miR-30b        | 0       | -0.525  | 0       | 0       | 1.2106  |
| hsa-miR-30c        | 0       | -0.3405 | 0       | 0       | 0.849   |
| hsa-miR-30c-1-star | 0       | 0       | 0.367   | 0.2008  | -0.1035 |
| hsa-miR-30c-2-star | 0       | 0       | 0       | 0       | 0.2586  |

|                   |         |         |         |           |         |
|-------------------|---------|---------|---------|-----------|---------|
| hsa-miR-30d       | 0       | -0.3896 | 0.2686  | 0         | 0.0484  |
| hsa-miR-30e       | 0       | -0.4155 | 0       | 0         | 0.8719  |
| hsa-miR-320       | 0       | -0.9138 | 0       | 0         | 1.0142  |
| hsa-miR-324-3p    | 0       | 0       | 1.1056  | 0.2404    | -0.3682 |
| hsa-miR-324-5p    | 0       | -0.2759 | 0       | 0         | 0.7145  |
| hsa-miR-325       | 0       | 0       | -0.1607 | 0         | 0       |
| hsa-miR-326       | 0       | -0.4653 | 0       | 0         | 0.0382  |
| hsa-miR-32-star   | 0       | 0       | -0.41   | 0         | 0.1061  |
| hsa-miR-330-5p    | 0       | 0.4978  | -1.076  | 0         | 0       |
| hsa-miR-331-3p    | 0       | 0       | -0.1496 | 0         | 0       |
| hsa-miR-338-5p    | 0       | 0       | -0.4879 | 0         | 0       |
| hsa-miR-339-5p    | 0       | 0       | 0       | -0.3003   | 0.3693  |
| hsa-miR-340       | -0.0417 | 0       | 0       | 0         | -0.0182 |
| hsa-miR-342-5p    | 0       | 0.5043  | -1.0558 | 0         | 0       |
| hsa-miR-34a       | 0       | 0       | -0.5451 | 0         | 0       |
| hsa-miR-34b       | 0       | 0       | -0.3006 | 0         | 0.0091  |
| hsa-miR-34b-star  | 0       | 0       | 0.6689  | 0         | 0       |
| hsa-miR-361-5p    | 0       | 0       | 0.2735  | 0         | 0       |
| hsa-miR-362-5p    | 0       | -0.2717 | 0       | -8.00E-04 | 0.5549  |
| hsa-miR-363       | 0       | -0.9003 | 0       | -0.3189   | 0.9356  |
| hsa-miR-363-star  | 0       | 0       | 0.9894  | 0         | 0       |
| hsa-miR-367       | 0       | 0       | 0.4978  | 0         | -0.4029 |
| hsa-miR-369-5p    | 0       | 0       | 0.2005  | 0         | -0.134  |
| hsa-miR-371-5p    | 0       | -0.0215 | 0       | 0         | 0.0217  |
| hsa-miR-373-star  | 0       | 0       | 0       | 0.1489    | 0       |
| hsa-miR-374a      | 0       | -0.3419 | 0       | -0.0671   | 1.232   |
| hsa-miR-374b      | 0       | -0.0122 | 0       | 0         | 0.3154  |
| hsa-miR-374b-star | 0       | 0.0067  | 0       | 0         | 0       |
| hsa-miR-377-star  | 0       | 0       | -0.7318 | 0         | 0       |
| hsa-miR-379       | 0       | 0       | 0.6997  | 0         | -0.3088 |
| hsa-miR-381       | 0       | 0.1419  | 0       | 0         | 0       |
| hsa-miR-383       | 0       | 0       | 0.5992  | 0         | -0.4129 |
| hsa-miR-410       | 0       | 0.3309  | 0       | 0         | -0.1761 |
| hsa-miR-422a      | 0       | 0       | -0.0669 | 0         | 0       |
| hsa-miR-423-3p    | 0       | -0.0406 | 0       | 0         | 0       |
| hsa-miR-423-5p    | 0       | 0       | 0.0158  | 0         | 0       |
| hsa-miR-424       | 0       | 0.0138  | 0       | 0         | 0       |
| hsa-miR-424-star  | 0       | 0       | -0.4648 | 0.1287    | 0       |
| hsa-miR-425       | 0       | -0.4991 | 0       | 0         | 1.0437  |
| hsa-miR-451       | 1.3066  | -0.6222 | -0.6678 | -0.771    | 1.0891  |
| hsa-miR-452       | 0       | 0.0822  | 0       | 0         | -0.1225 |
| hsa-miR-455-3p    | 0       | 0       | 0.2372  | 0         | -0.3518 |
| hsa-miR-483-3p    | 0.0275  | 0       | -0.0828 | 0         | 0       |
| hsa-miR-484       | 0       | -0.311  | 0       | 0         | 0.5283  |
| hsa-miR-485-3p    | 0       | 0       | -0.2302 | 0         | 0       |
| hsa-miR-485-5p    | 0.3217  | 0       | -0.2983 | 0         | 0       |
| hsa-miR-486-5p    | 0.2059  | -1.3651 | 0       | -0.3769   | 1.603   |
| hsa-miR-487b      | 0       | 0       | 0.0733  | 0         | -0.2122 |
| hsa-miR-488       | -0.1361 | 0.6036  | 0       | 0         | 0       |
| hsa-miR-490-5p    | 0.2561  | 0       | 0       | 0         | -0.0582 |
| hsa-miR-491-3p    | 0       | -0.4466 | 0.6371  | 0         | 0       |
| hsa-miR-492       | 0       | 0       | -0.5696 | 0.2679    | 0       |
| hsa-miR-493       | 0       | 0       | 0       | 0         | 0.1785  |
| hsa-miR-493-star  | 0       | 0       | 0       | -0.0066   | 0.1031  |
| hsa-miR-498       | 0       | 0.2156  | 0.0893  | 0         | -0.7827 |
| hsa-miR-499-3p    | 0       | 0       | 0       | 0         | -0.0089 |
| hsa-miR-500       | 0       | 0       | -0.1115 | 0         | 0       |
| hsa-miR-500-star  | 0       | -0.0849 | 0       | 0         | 0       |
| hsa-miR-501-3p    | 0       | 0       | 0.2941  | 0         | -0.1425 |
| hsa-miR-502-3p    | 0       | -0.2312 | 0       | 0         | 0.3729  |
| hsa-miR-503       | 0       | 0       | 0       | 0         | 0.1415  |
| hsa-miR-506       | 0       | 0       | 0.3487  | 0         | -0.0607 |
| hsa-miR-507       | 0       | 0       | 0.6879  | 0         | -0.4553 |

|                         |         |         |         |         |         |
|-------------------------|---------|---------|---------|---------|---------|
| hsa-miR-508-3p          | 0       | 0       | 0.4953  | 0       | -0.3719 |
| hsa-miR-509-3-5p        | 0       | 0       | 0.6971  | 0       | -0.0838 |
| hsa-miR-509-3p          | 0       | 0       | 0.6571  | 0       | -0.318  |
| hsa-miR-513a-5p         | 0       | 0       | 0       | -0.3803 | 0.6288  |
| hsa-miR-518a-3p         | 0.1202  | 0       | -0.6048 | 0       | 0       |
| hsa-miR-518a-5p; hsa-mi | -0.302  | 0.1228  | 0.1998  | 0       | -0.3639 |
| hsa-miR-518b            | 0       | 0       | 0       | 0       | -0.0677 |
| hsa-miR-518c-star       | 0       | 0.925   | 0       | 0       | -0.6304 |
| hsa-miR-518f            | 0       | 0       | 0       | 0       | -0.0399 |
| hsa-miR-518f-star       | 0       | 0.2877  | 0       | 0       | 0       |
| hsa-miR-519c-5p; hsa-mi | -0.5008 | 1.3106  | 0       | 0       | -0.9441 |
| hsa-miR-519d            | 0       | 0       | -0.2222 | 0       | 0       |
| hsa-miR-519e            | 0       | 0       | -0.1526 | 0       | 0       |
| hsa-miR-519e-star       | 0       | 0       | 0       | 0       | -0.1978 |
| hsa-miR-520d-5p         | 0       | 0       | 0.8895  | 0.2786  | -0.219  |
| hsa-miR-524-3p          | 0       | 0       | 0.6611  | 0       | -0.0755 |
| hsa-miR-524-5p          | -0.023  | 0.8731  | 0       | 0       | 0       |
| hsa-miR-525-3p          | 0       | 0       | -0.7056 | 0       | 0       |
| hsa-miR-525-5p          | 0       | 0.163   | 0       | 0       | -0.5485 |
| hsa-miR-526a; hsa-miR-5 | -0.2318 | 0.9783  | 0       | 0       | -0.0197 |
| hsa-miR-526b            | 0       | 0.512   | 0       | 0       | 0       |
| hsa-miR-541             | 0.114   | 0       | 0       | 0       | 0       |
| hsa-miR-542-3p          | 0       | 0       | 0.8507  | 0       | 0       |
| hsa-miR-548a-5p         | 0       | 0       | 0       | 0.024   | -0.239  |
| hsa-miR-548b-3p         | 0       | 0       | 0.4959  | 0       | 0       |
| hsa-miR-548b-5p         | 0       | 0       | -0.0282 | 0.4837  | 0       |
| hsa-miR-549             | 0       | 0.1032  | -0.4813 | 0       | 0       |
| hsa-miR-550             | 0       | 0       | -0.0705 | 0       | 0       |
| hsa-miR-551b            | 0       | -0.0788 | 0       | -0.0773 | 0.7198  |
| hsa-miR-551b-star       | 0       | 0.1168  | -0.8853 | 0       | 0       |
| hsa-miR-553             | 0       | 0.2925  | 0       | 0       | 0       |
| hsa-miR-555             | 0       | 0       | 0       | 0       | -0.15   |
| hsa-miR-558             | 0       | 0       | 0       | 0.2074  | -0.1978 |
| hsa-miR-571             | 0       | 0       | 0.1633  | 0       | 0       |
| hsa-miR-574-5p          | 0.0541  | 0       | -0.5396 | 0       | 0       |
| hsa-miR-575             | 0       | 0       | -0.4754 | 0.4216  | 0       |
| hsa-miR-578             | 0       | 0       | 0.3392  | 0       | -0.3157 |
| hsa-miR-580             | 0       | 0       | 0.2442  | 0       | -0.48   |
| hsa-miR-583             | 0       | 0.5723  | 0       | 0       | -0.4194 |
| hsa-miR-584             | 0       | 0       | -0.2659 | 0       | 0       |
| hsa-miR-585             | 0       | 0       | 0       | 0       | -0.037  |
| hsa-miR-589-star        | 0       | 0       | 0       | 0       | -0.2195 |
| hsa-miR-593-star        | -0.0775 | 0       | 0       | 0       | 0       |
| hsa-miR-595             | 0       | 0       | -0.1179 | 0       | 0       |
| hsa-miR-596             | 0       | 0       | -0.729  | 0       | 0       |
| hsa-miR-600             | 0       | 0       | 0.1001  | 0       | -0.4656 |
| hsa-miR-602             | 0       | 0       | 0.3313  | 0.3469  | -0.6223 |

|                  |         |         |         |         |         |
|------------------|---------|---------|---------|---------|---------|
| hsa-miR-605      | 0       | 0       | 0.0967  | 0       | 0       |
| hsa-miR-612      | 0       | 0       | 0.0038  | 0       | 0       |
| hsa-miR-615-3p   | 0.083   | 0       | -0.5967 | 0       | 0       |
| hsa-miR-615-5p   | 0       | 0       | 0.6657  | 0       | 0       |
| hsa-miR-617      | 0       | 0       | 0       | 0.7941  | -0.1271 |
| hsa-miR-620      | -0.0015 | 0.3192  | -0.7308 | 0.3439  | 0       |
| hsa-miR-622      | 0       | 0       | 0.3329  | 0       | 0       |
| hsa-miR-623      | 0       | 0       | 0       | 0       | -0.3492 |
| hsa-miR-625      | 0       | 0.5599  | 0       | 0       | -0.232  |
| hsa-miR-625-star | 0       | 0       | 0.3114  | 0       | -0.153  |
| hsa-miR-627      | 0       | 0.0398  | 0       | 0       | 0       |
| hsa-miR-628-3p   | 0       | 0       | 0       | -0.1666 | 0.0262  |
| hsa-miR-630      | 0       | 0       | 0.7597  | 0       | -0.3197 |
| hsa-miR-634      | 0       | -0.2474 | 0       | 0       | 0.1896  |
| hsa-miR-635      | 0       | 0       | 0.7293  | 0       | -0.4336 |
| hsa-miR-638      | 0       | 0       | 0.5285  | 0.3711  | -0.7827 |
| hsa-miR-640      | 0       | 0       | 0.3513  | 0       | 0       |
| hsa-miR-642      | 0       | -0.2275 | 0       | 0       | 0.1702  |
| hsa-miR-647      | 0       | 0       | -1.0032 | 0       | 0.0885  |
| hsa-miR-652      | 0       | -0.6054 | -0.3424 | -0.2131 | 1.449   |
| hsa-miR-656      | 0       | -0.1005 | 0.6781  | 0       | 0       |
| hsa-miR-660      | 0       | -0.2552 | 0.4835  | 0       | 0.0438  |
| hsa-miR-662      | 0       | 0.015   | 0       | 0       | 0       |
| hsa-miR-665      | 0       | 0       | 0.2738  | 0       | 0       |
| hsa-miR-671-5p   | 0       | 0.0724  | 0       | 0.2812  | -0.1996 |
| hsa-miR-675      | 0       | 0       | 0.6062  | 0.2423  | -0.1936 |
| hsa-miR-744      | 0       | 0       | 0       | 0       | 0.1716  |
| hsa-miR-766      | 0       | -0.1692 | 0       | 0       | 0       |
| hsa-miR-767-3p   | 0       | 0       | 0.1613  | 0       | 0       |
| hsa-miR-767-5p   | 0       | 0       | 0.7183  | 0       | -0.0922 |
| hsa-miR-768-3p   | 0       | 0       | -0.4311 | 0       | 0.2695  |
| hsa-miR-802      | 0       | 0       | 0       | 0       | -0.2097 |
| hsa-miR-874      | 0       | 0       | 1.2588  | 0.5442  | -0.7019 |
| hsa-miR-877      | 0       | 0       | 0       | 0       | -0.0808 |
| hsa-miR-877-star | 0       | 0       | 0.2041  | 0       | 0       |
| hsa-miR-885-3p   | 0       | 0       | -0.2166 | 0       | 0       |
| hsa-miR-885-5p   | 0       | 0       | -0.6101 | 0       | 0       |
| hsa-miR-886-3p   | 0       | -0.2213 | 0.5441  | 0       | 0       |
| hsa-miR-886-5p   | 0       | -0.1288 | 0.7541  | 0       | 0       |
| hsa-miR-890      | 0       | 0       | 0.744   | 0       | 0       |
| hsa-miR-891a     | -0.0494 | 0       | 0       | 0.7353  | -0.0698 |
| hsa-miR-892b     | 0       | 0       | 0.2205  | 0       | 0       |
| hsa-miR-923      | 0       | 0       | 0       | 0       | -0.3107 |
| hsa-miR-92a      | 0       | -0.2338 | 0       | -0.3002 | 0.8446  |
| hsa-miR-92b      | 0       | -0.0349 | 0       | 0       | 0.4718  |
| hsa-miR-93       | 0       | -0.7524 | -0.5657 | -0.5505 | 1.8579  |
| hsa-miR-933      | 0       | 0       | 1.5589  | 0.0088  | -0.5781 |
| hsa-miR-934      | 0       | 0.1319  | 0       | 0       | 0       |
| hsa-miR-936      | 0       | 0       | -0.3949 | 0       | 0       |
| hsa-miR-938      | 0       | 0       | -0.1057 | 0       | 0       |
| hsa-miR-939      | 0       | 0       | 0       | 0       | 0.0126  |
| hsa-miR-940      | 0       | 0       | 1.033   | 0.3962  | -0.4327 |
| hsa-miR-940      | 0       | 0       | 0.7456  | 0.1481  | -0.3162 |
| hsa-miR-943      | 0       | -0.0297 | 1.828   | 0.083   | -0.7699 |
| hsa-miR-944      | 0       | 0.2292  | -0.8407 | 0       | 0       |
| hsa-miR-96       | 0       | 0       | 0       | -0.0187 | 0.0702  |
| hsa-miR-98       | 0       | 0       | 0       | 0       | 0.2809  |
| hsa-miR-99a-star | 0       | 0       | 0.5362  | 0       | 0       |
| hsa-miR-99b-star | 0       | 0       | -0.588  | 0       | 0       |
| hsa-miR-9-star   | -0.593  | 1.0352  | -0.0654 | 1.0209  | -0.8156 |
