# Supplementary material for: MicroRNA markers for forensic body fluid identification obtained from microarray screening and quantitative RT-PCR confirmation
Source: Springer Nature journal article supplement (doi:10.1007/s00414-009-0402-3), 2010-02-09

|    |                    |
|----|--------------------|
| MS | menstrual blood    |
| SA | saliva             |
| SE | semen              |
| VS | vaginal secretion  |
| WB | whole venous blood |

R - Pearson correlation coefficient

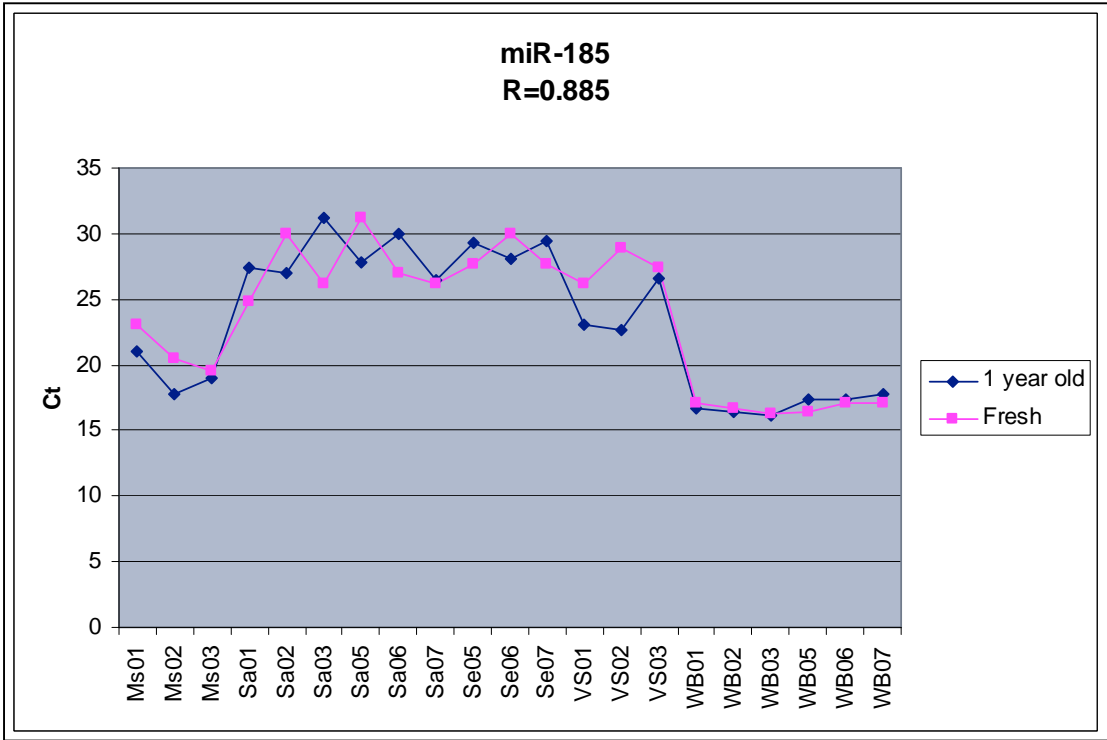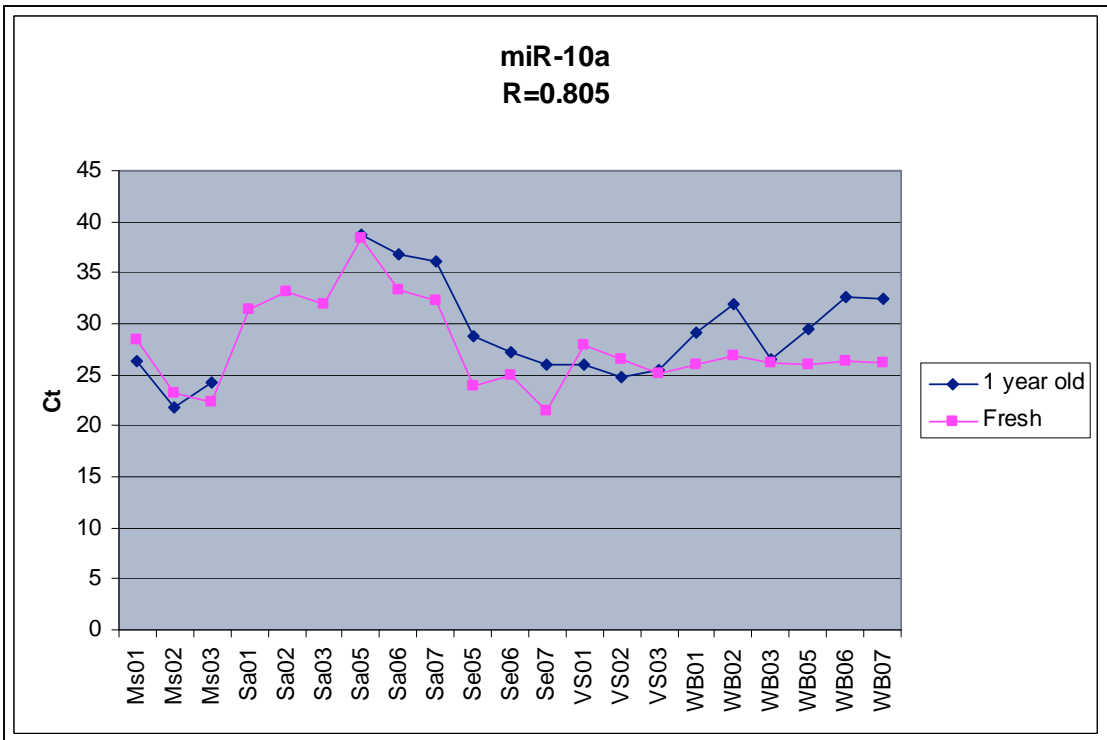

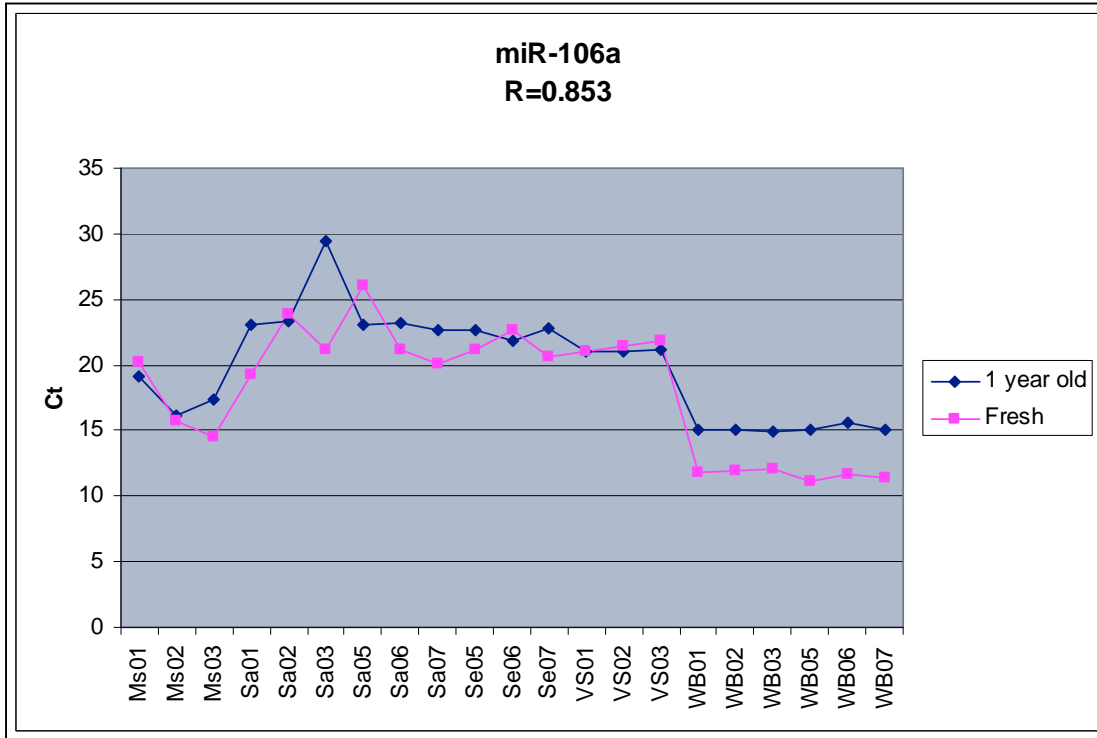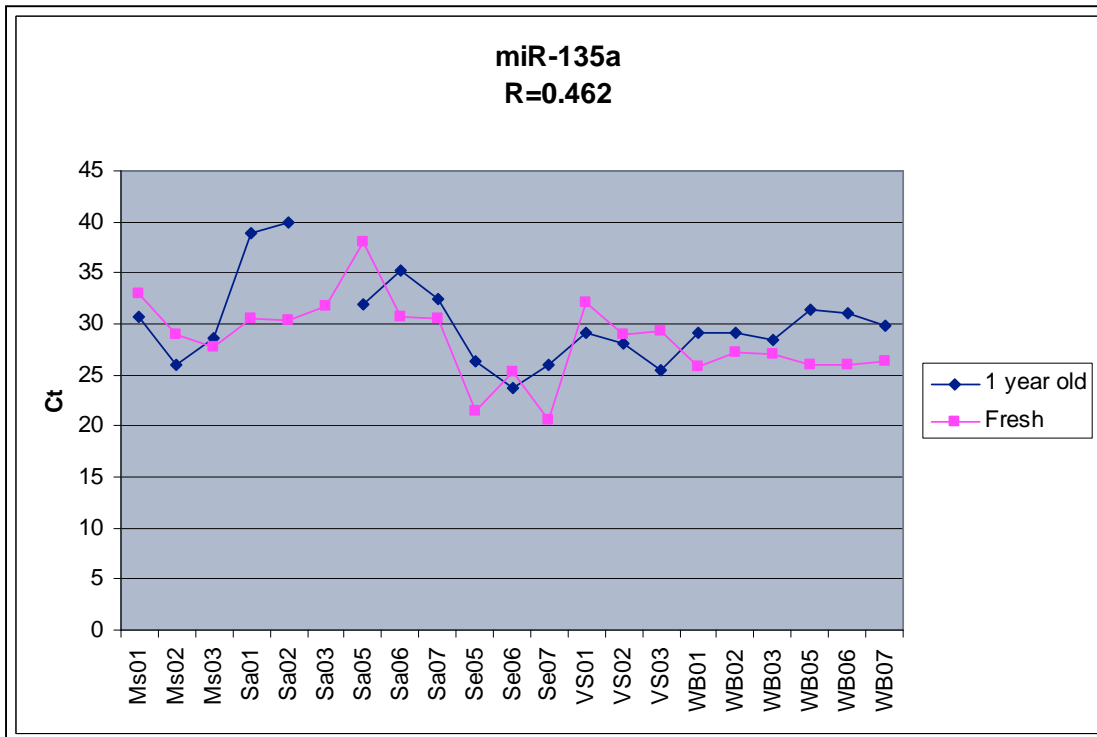

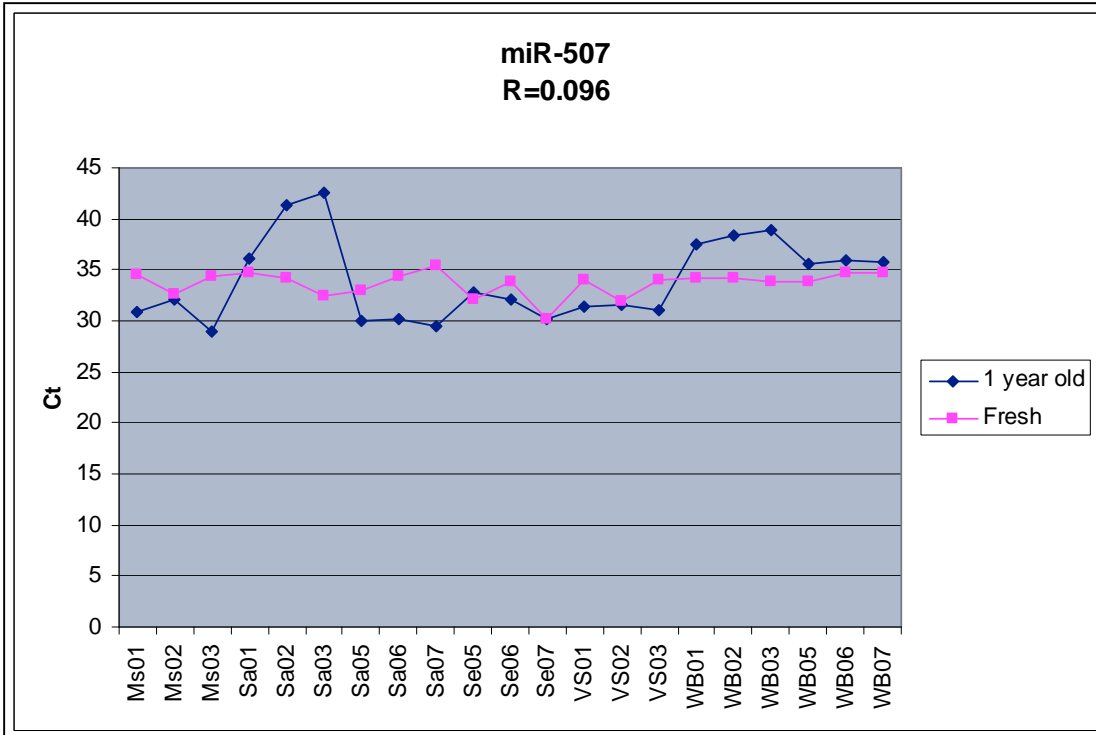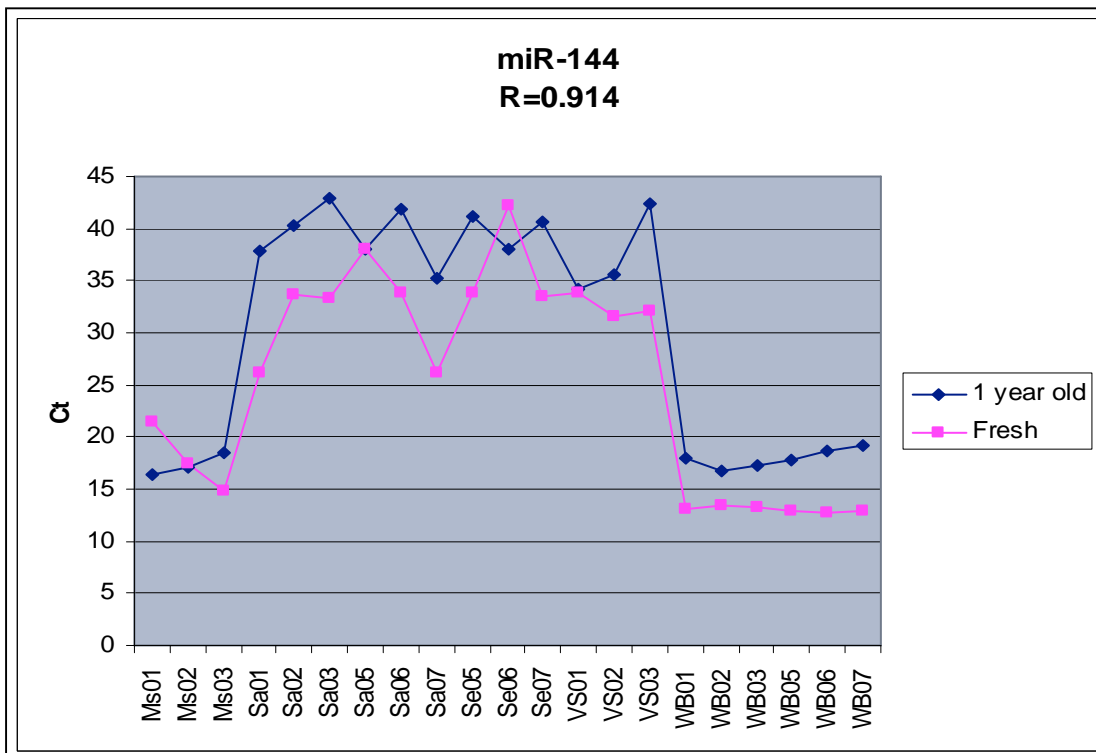

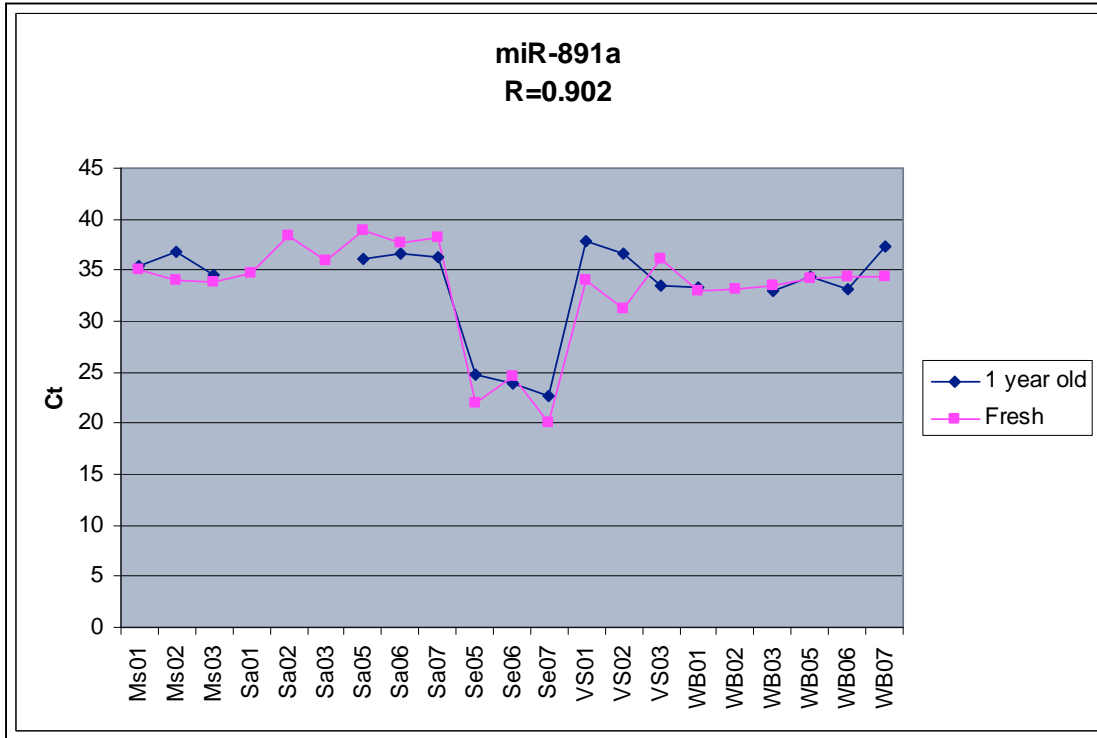

Supplement: MOESM5 [file 8445952]
