# Supplementary figures and images for: MicroRNA markers for forensic body fluid identification obtained from microarray screening and quantitative RT-PCR confirmation
Source: PubMed Central journal article supplement — Int J Legal Med. 2010 Feb 10;124(3):217–26. doi: 10.1007/s00414-009-0402-3 (PMC2855015; doi:10.1007/s00414-009-0402-3), 2010-02-10

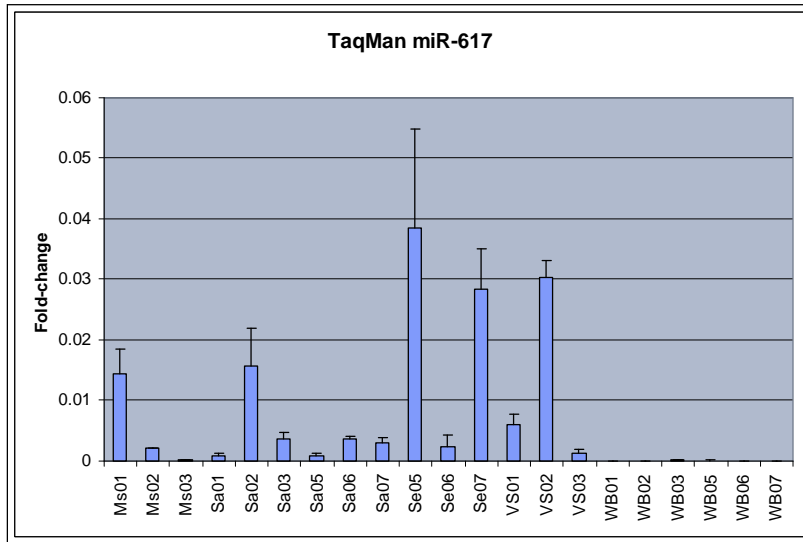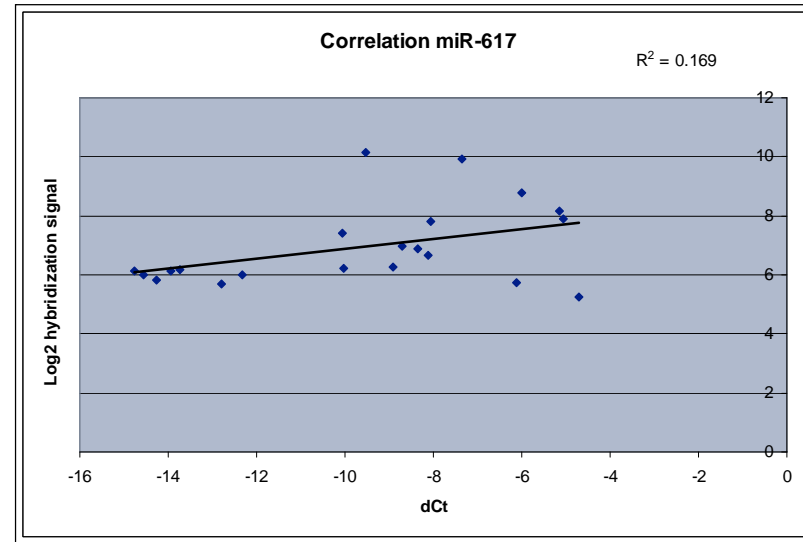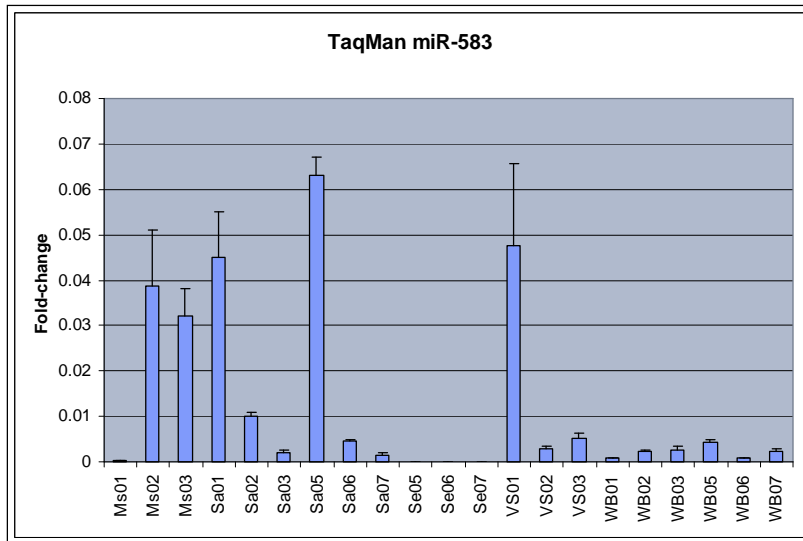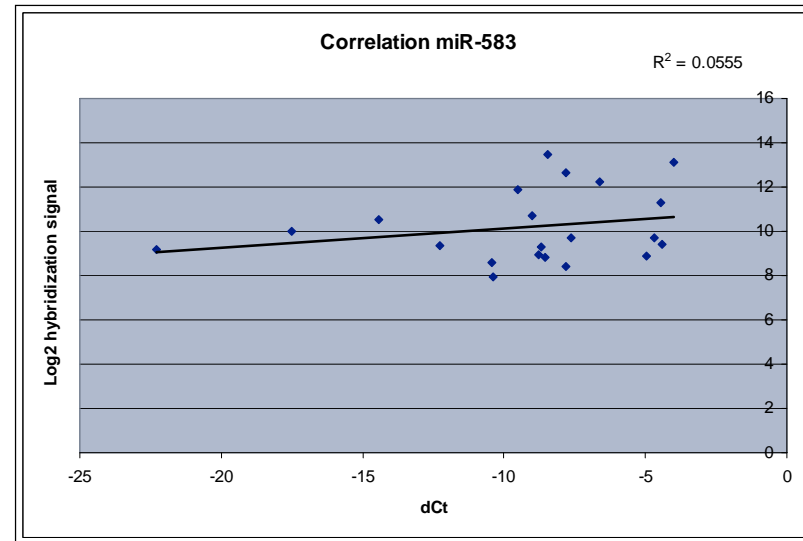

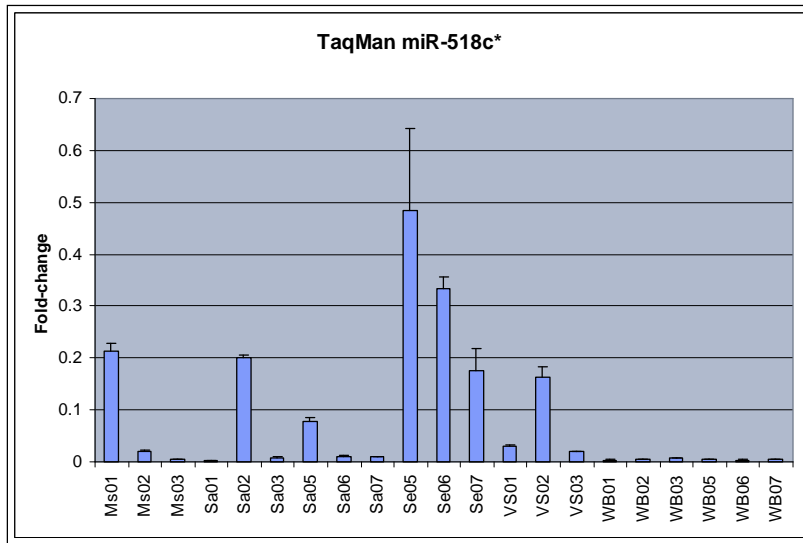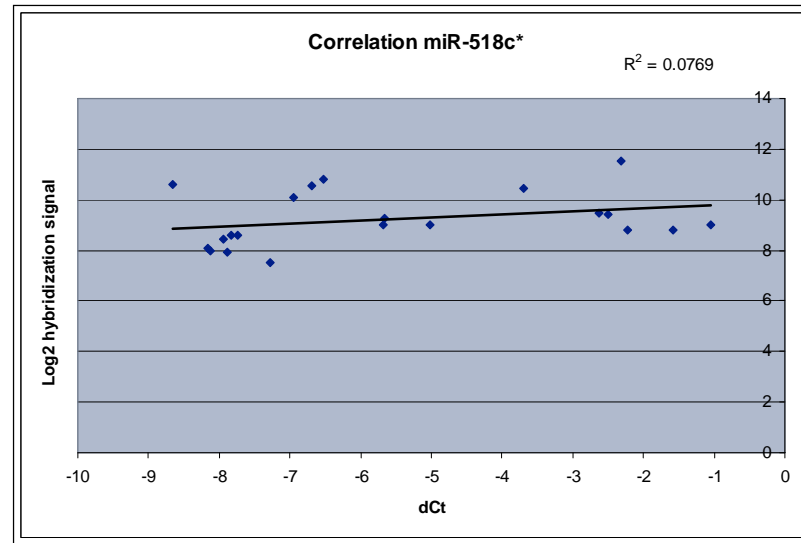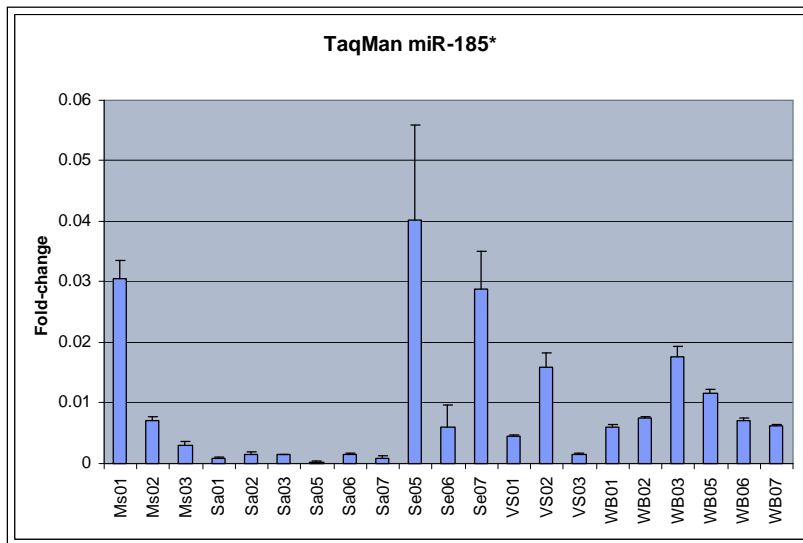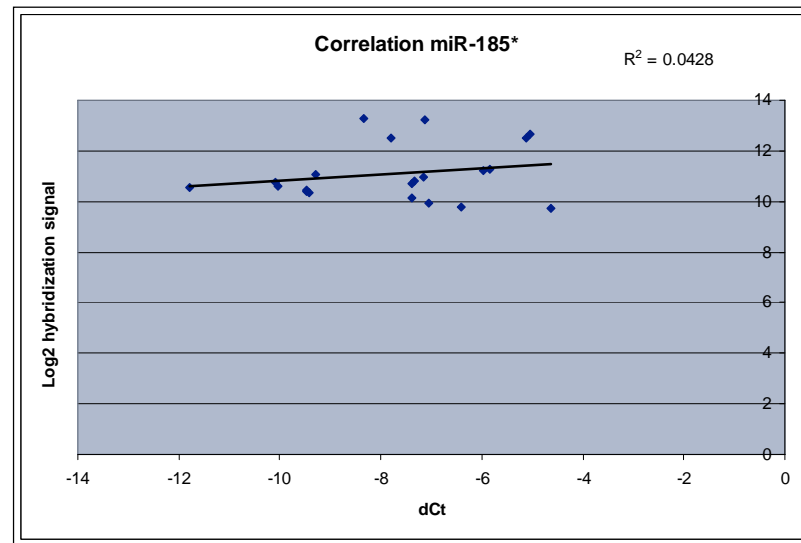

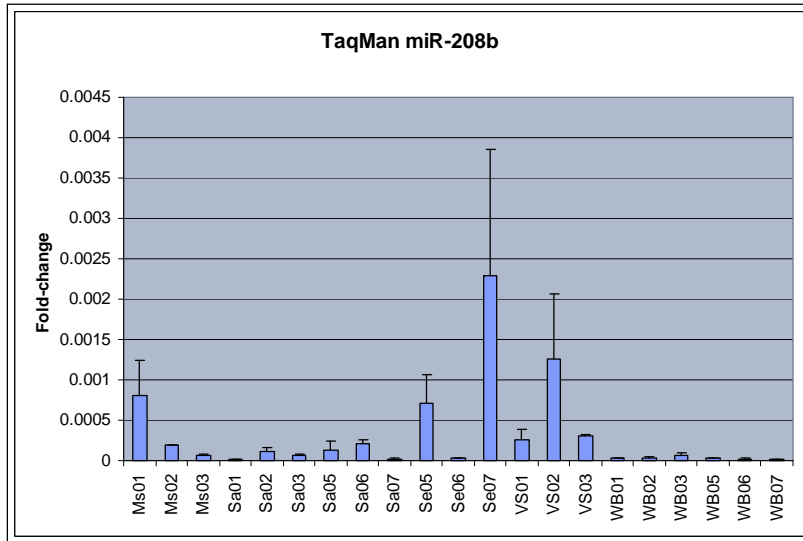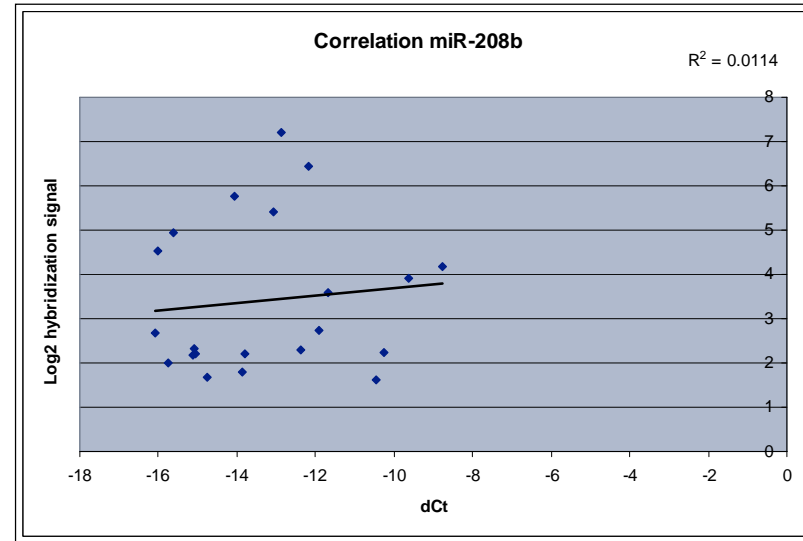

Supplement: 414_2009_402_MOESM3_ESM.pdf [file 414_2009_402_MOESM3_ESM.pdf]

| Linearization of 10-fold dilutions of RNA template |                      |
|----------------------------------------------------|----------------------|
| Concentration ng/uL                                | Log10_Concentrations |
| 20                                                 | 1.301029996          |
| 2                                                  | 0.301029996          |
| 0.2                                                | -0.698970004         |
| 0.02                                               | -1.698970004         |
| 0.002                                              | -2.698970004         |

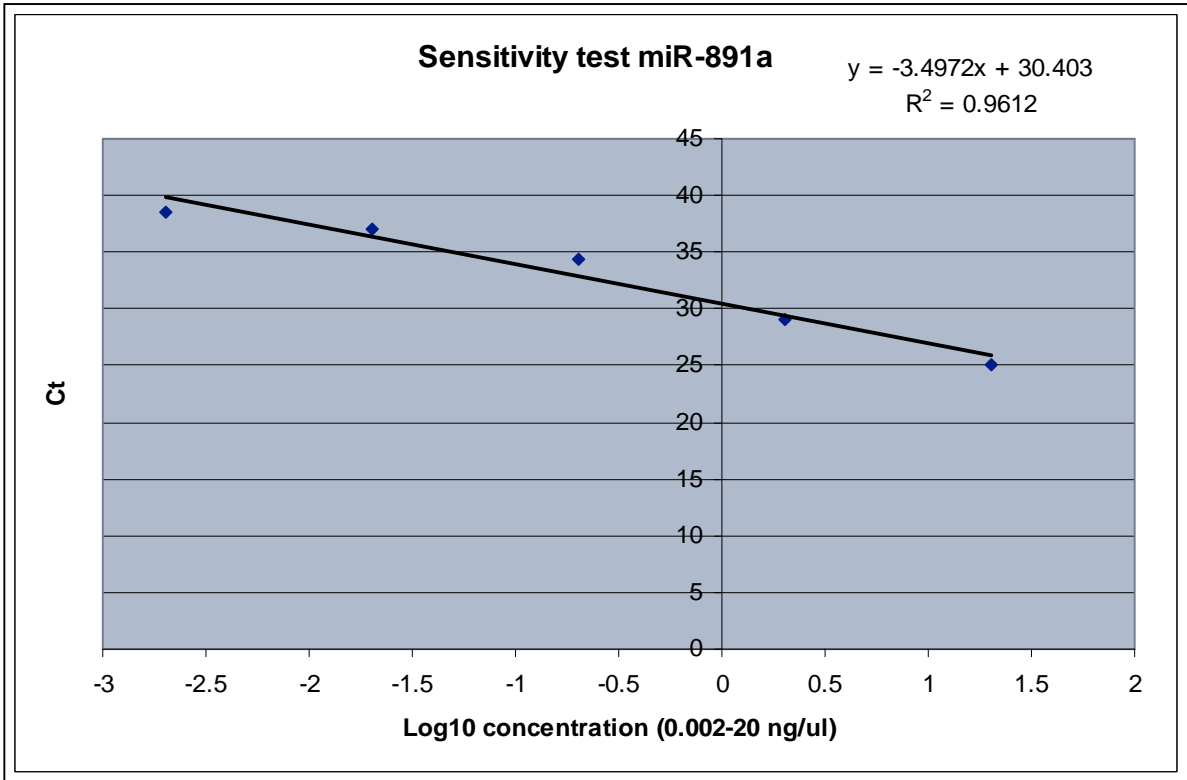

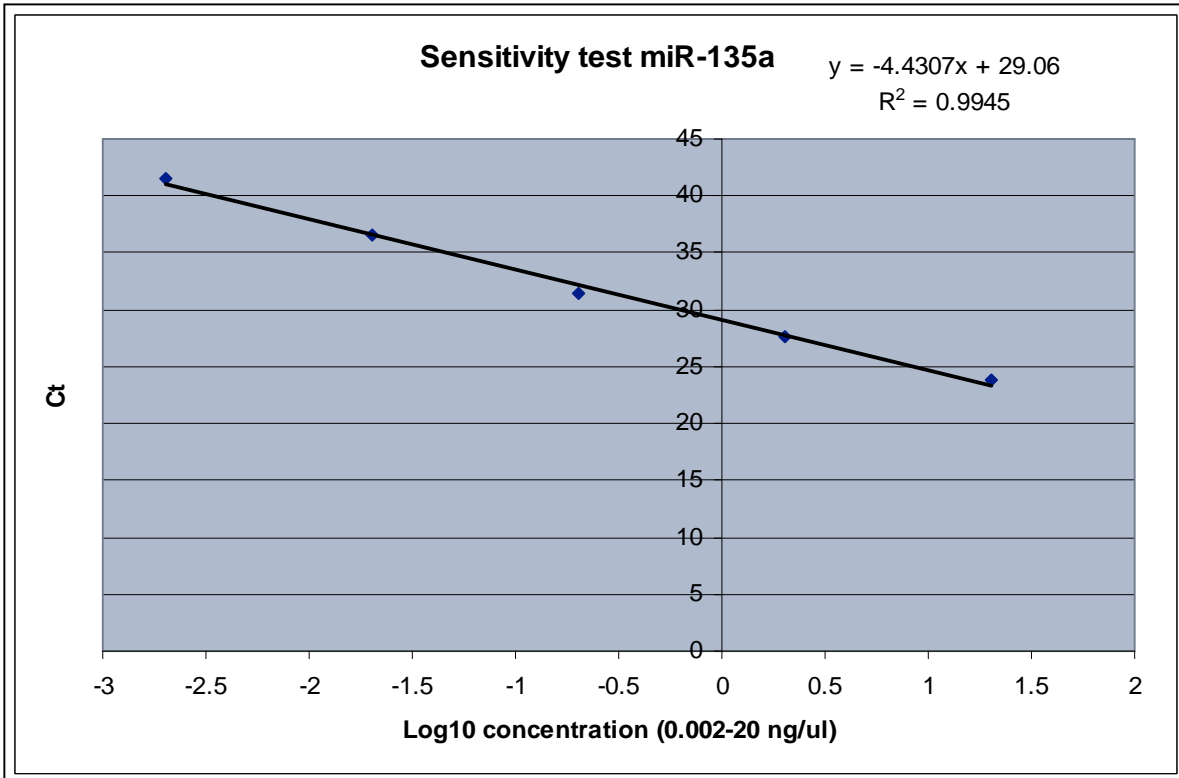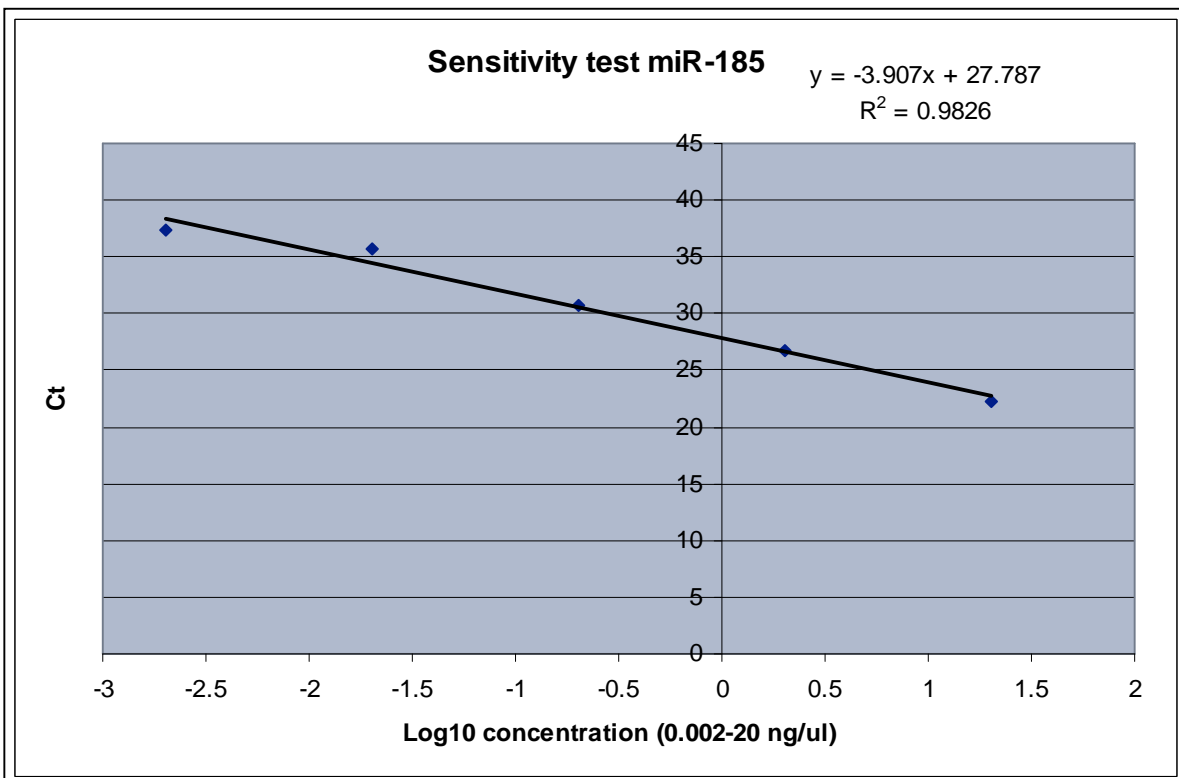

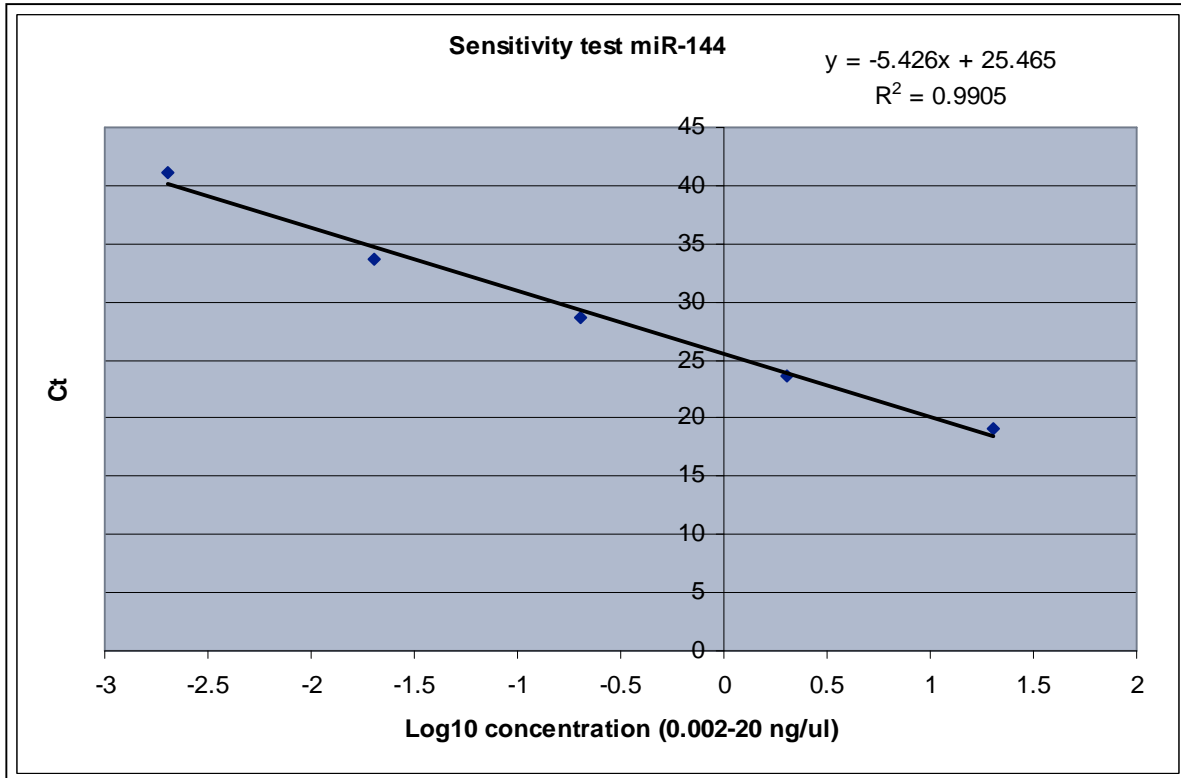

Supplement: 414_2009_402_MOESM6_ESM.pdf [file 414_2009_402_MOESM6_ESM.pdf]
